# Supplementary material
Source: PubMed Central journal article supplement (PMC2675617)

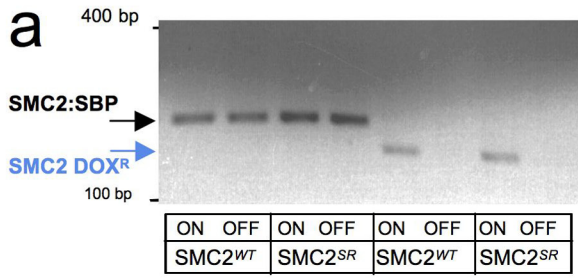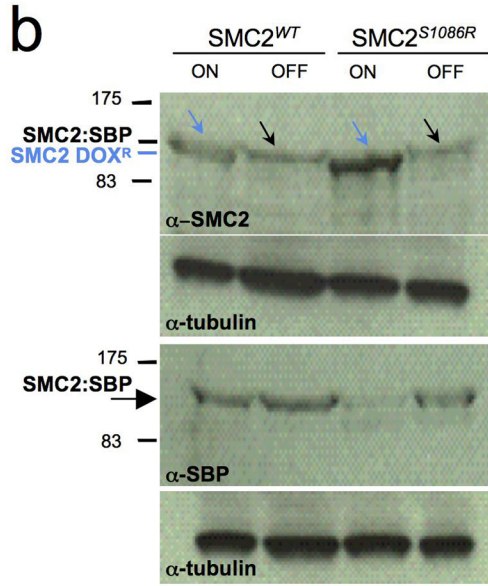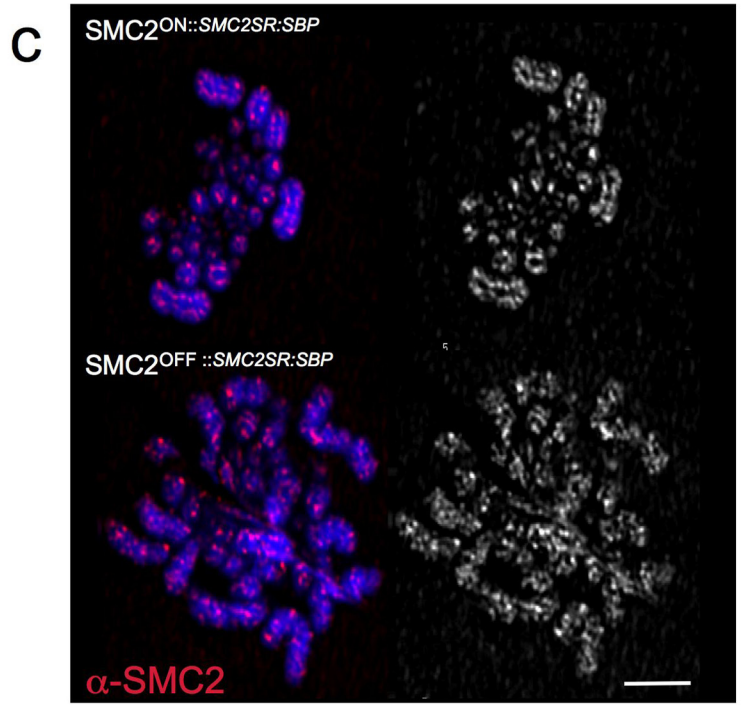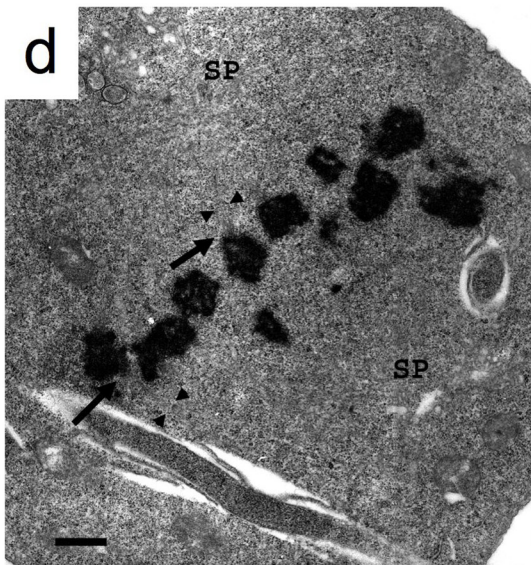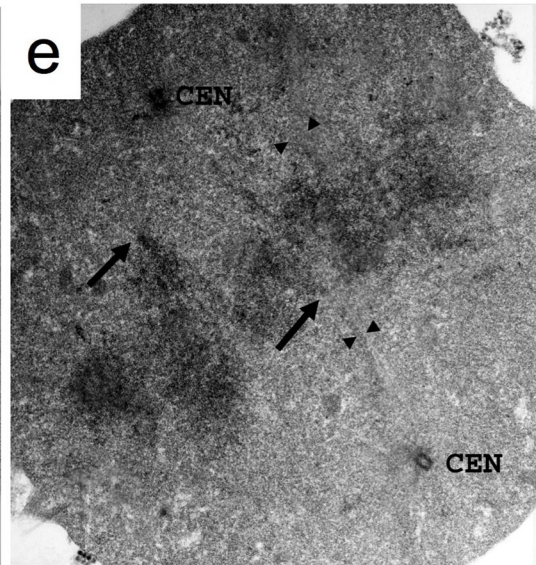

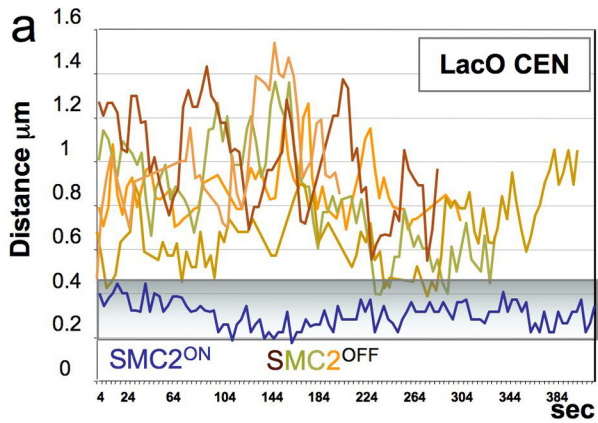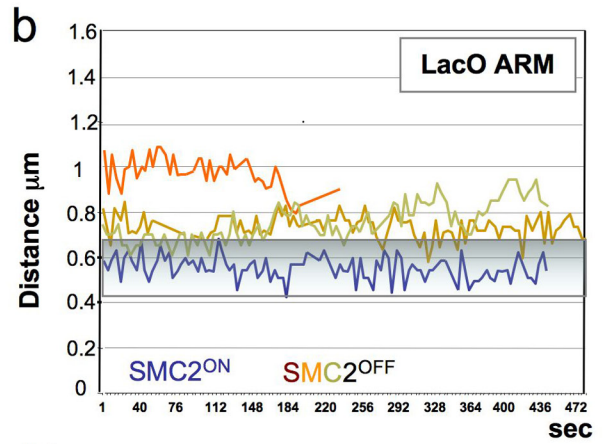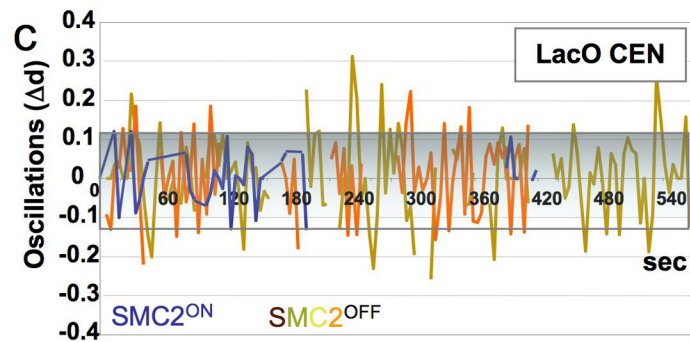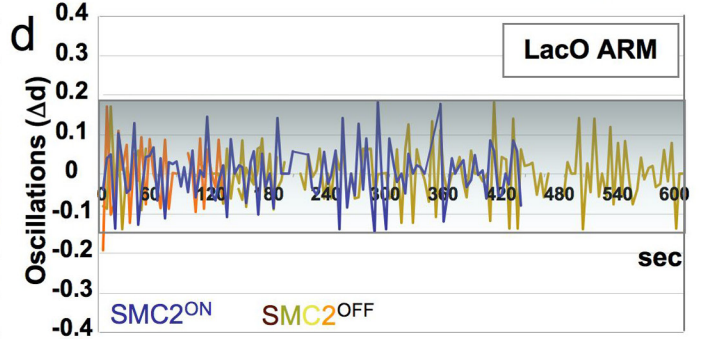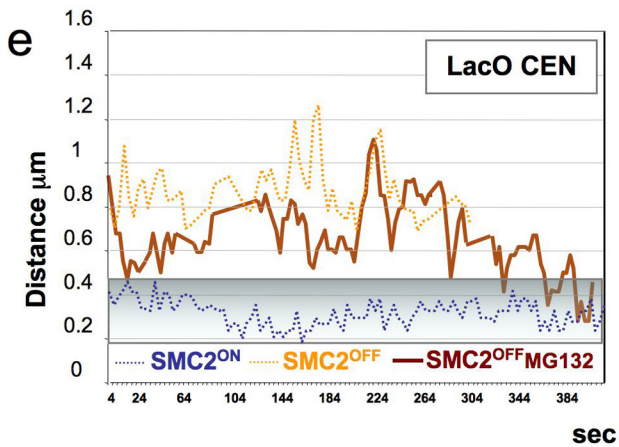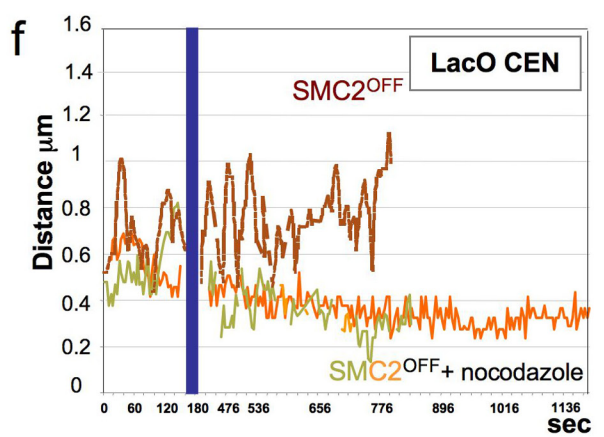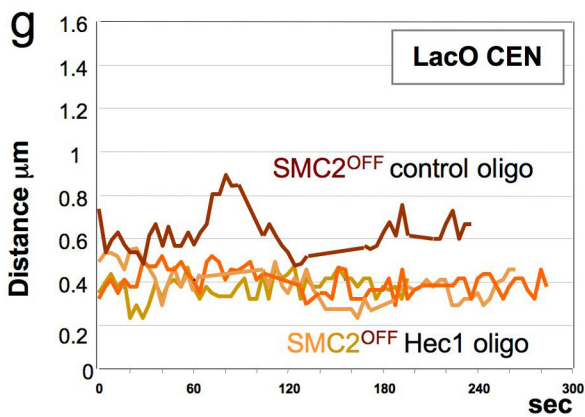

Supplement: E08-11-1127_1.pdf [file E08-11-1127_1.pdf]
